# Supplementary material for: A case of multifunctional intermetallic compounds: negative thermal expansion coupling with magnetocaloric effect in (Gd,Ho)(Co,Fe)2
Source: Royal Society of Chemistry journal article supplement (doi:10.1039/c9qi00880b), 2019-01-01
Supplement: c9qi00880b1.pdf [file c9qi00880b1.pdf]

## supplementary information

### **A case of multifunctional intermetallic compounds: negative thermal expansion coupling with magnetocaloric effect in (Gd,Ho)(Co,Fe)<sub>2</sub>**

Jinyu Hu,<sup>a, †</sup> Kun Lin,<sup>a, †</sup> Yili Cao,<sup>a</sup> Rongjin Huang,<sup>b</sup> Takeshi Matsukawa,<sup>c</sup> Toru Ishigaki,<sup>c</sup> Henry E. Fischer,<sup>d</sup> Kenichi Kato,<sup>e</sup> Takashi Honda,<sup>f</sup> Kazutaka Ikeda,<sup>f</sup> Toshiya Otomo,<sup>f</sup> Kenji Ohoyama,<sup>g</sup> Jinxia Deng,<sup>a</sup> Jun Chen,<sup>a</sup> Xianran Xing<sup>a,\*</sup>

<sup>a</sup> *Beijing Advanced Innovation Center for Materials Genome Engineering, Institute of Solid State Chemistry, Department of Physical Chemistry, and State Key Laboratory of Advanced Metals and Materials, University of Science and Technology Beijing, Beijing 100083, China.*

<sup>b</sup> *State Key Laboratory of Technologies in Space Cryogenic Propellants, Technical Institute of Physics and Chemistry, Chinese Academy of Sciences, Beijing, PR China, University of Chinese Academy of Sciences, Beijing, PR China*

<sup>c</sup> *Frontier Research Center for Applied Atomic Sciences, Ibaraki University, 162-1, Shirakata, Tokai, Ibaraki 319-1106, Japan*

<sup>d</sup> *Institut Laue-Langevin, 71 avenue des Martyrs, CS 20156, 38042 Grenoble cedex 9, France*

<sup>e</sup> *RIKEN SPring-8 Center, Hyogo 679-5148, Japan*

<sup>f</sup> *Institute of Materials Structure Science, High Energy Accelerator Research Organization (KEK), Tsukuba, Ibaraki 305-0801, Japan.*

<sup>g</sup> *Graduate School of Science and Engineering, Ibaraki University, Hitachi, Ibaraki 316-8511, Japan*

---

\* Corresponding author.  
Electronic mail: [xing@ustb.edu.cn](mailto:xing@ustb.edu.cn).

## Supplementary Figures

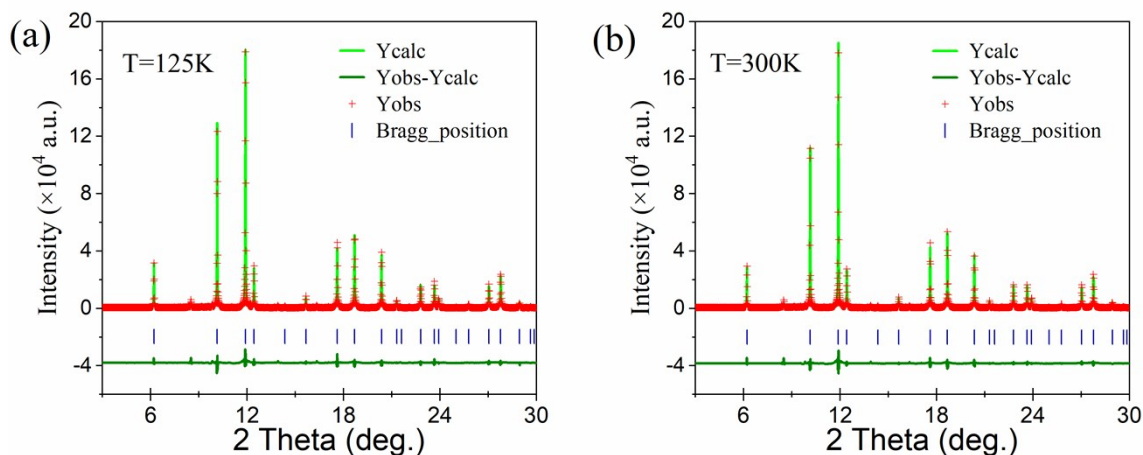

**Figure S1.** (a, b) Rietveld refinement patterns of high-resolution synchrotron X-ray powder diffraction (SPD) data for  $\text{Gd}_{0.3}\text{Ho}_{0.7}\text{Co}_{1.92}\text{Fe}_{0.08}$  (GHCF) at 125 K and 300 K: the patterns were fitted using the cubic structure (RIKEN SPring-8 Center, Japan;  $\lambda = 0.45 \text{ \AA}$ ). There is no peak split in the NPD patterns for GHCF from 10 to 350 K (**Figure 1b**), but minor split was observed in the high-resolution synchrotron X-ray powder diffraction patterns (SPD),<sup>1</sup> suggesting GHCF is a pseudo-cubic phase below  $T_C$  and changes to cubic above  $T_C$ .

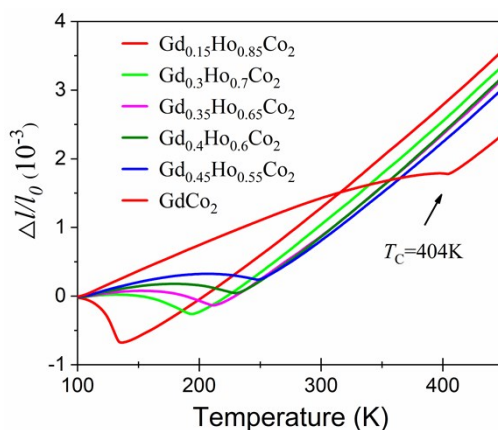

**Figure S2.** Thermal expansion of  $\text{Gd}_x\text{Ho}_{1-x}\text{Co}_2$  determined by a thermo-dilatometer. The linear thermal expansion curves ( $\Delta l/l_0$ ) were measured by an advanced dilatometer (NETZSCH DIL402) with heating rate of 5 K/min.

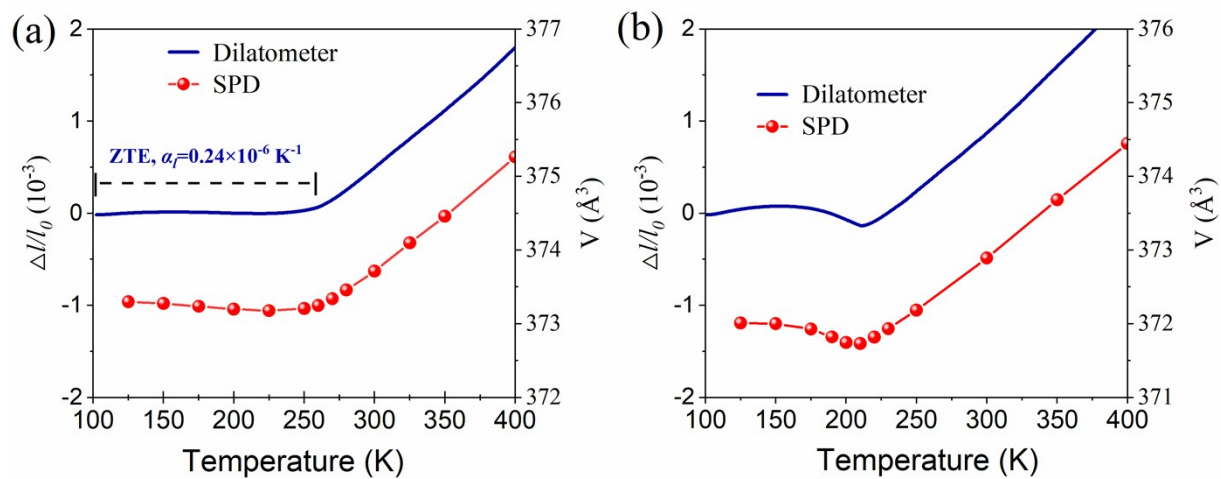

**Figure S3.** Thermal expansion of (a)  $\text{Gd}_{0.3}\text{Ho}_{0.7}\text{Co}_{1.92}\text{Fe}_{0.08}$  (GHCF) and (b)  $\text{Gd}_{0.35}\text{Ho}_{0.75}\text{Co}_2$  confirmed by both dilatometer and high-resolution synchrotron X-ray powder diffraction experiments.

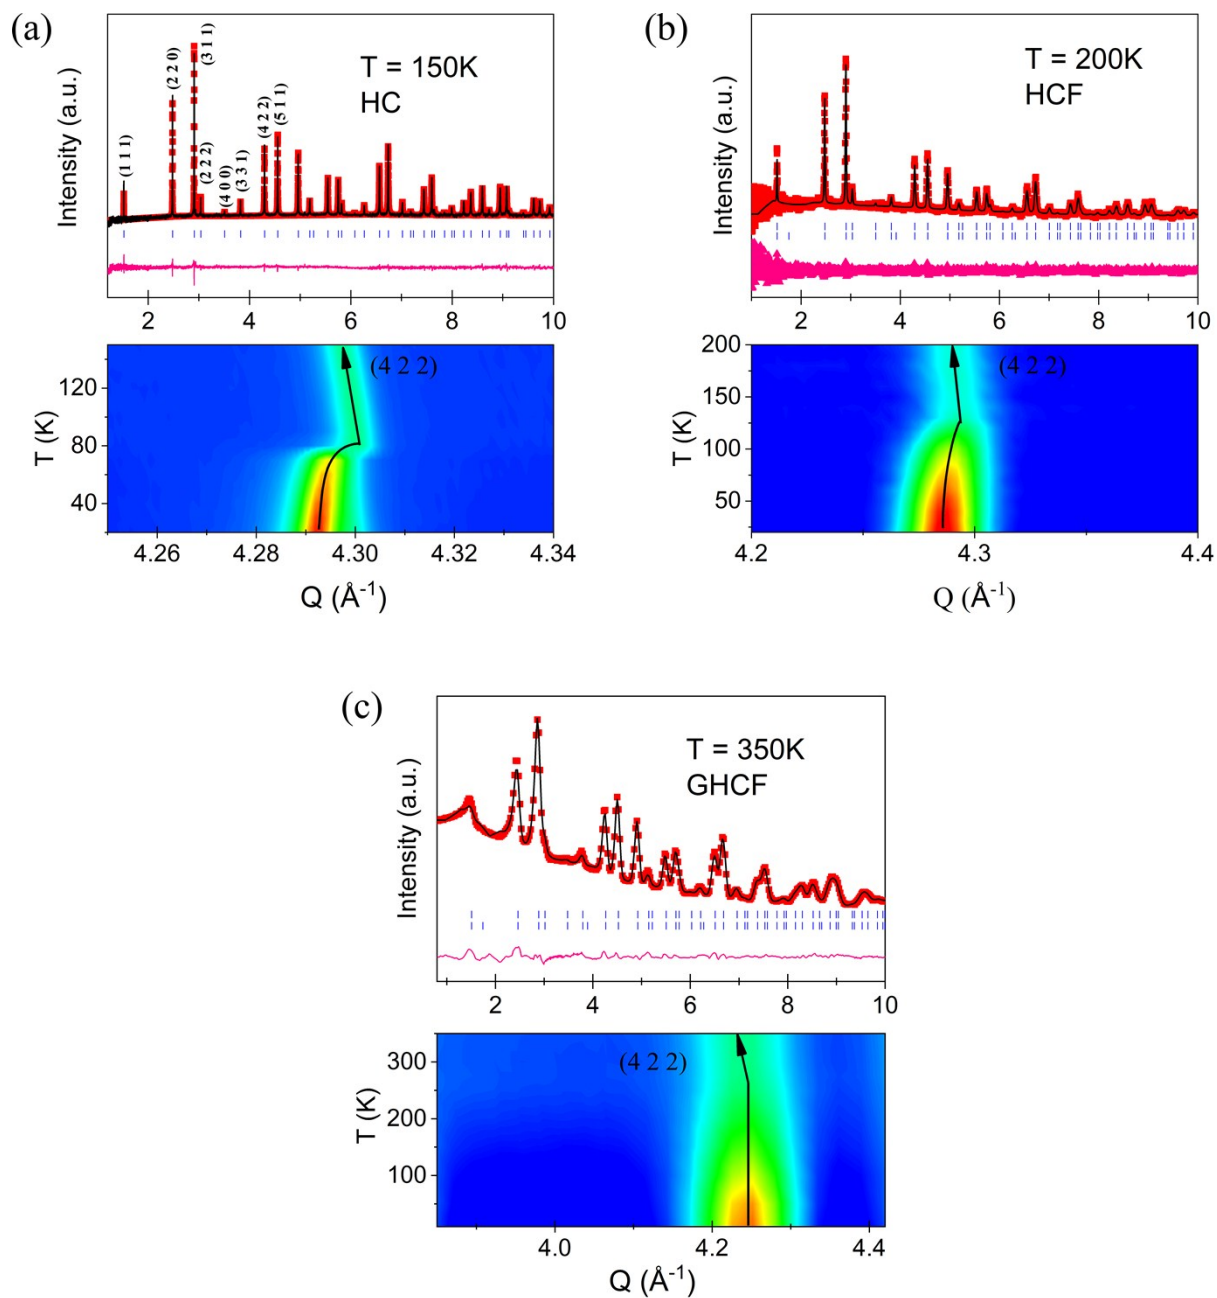

**Figure S4.** Structure refinements of NPD patterns and contour plots of the (4 2 2) profile intensity for (a)  $\text{HoCo}_2$  (HC), (b)  $\text{HoCo}_{1.92}\text{Fe}_{0.08}$  (HCF) and (c)  $\text{Gd}_{0.3}\text{Ho}_{0.7}\text{Co}_{1.92}\text{Fe}_{0.08}$  (GHCF).

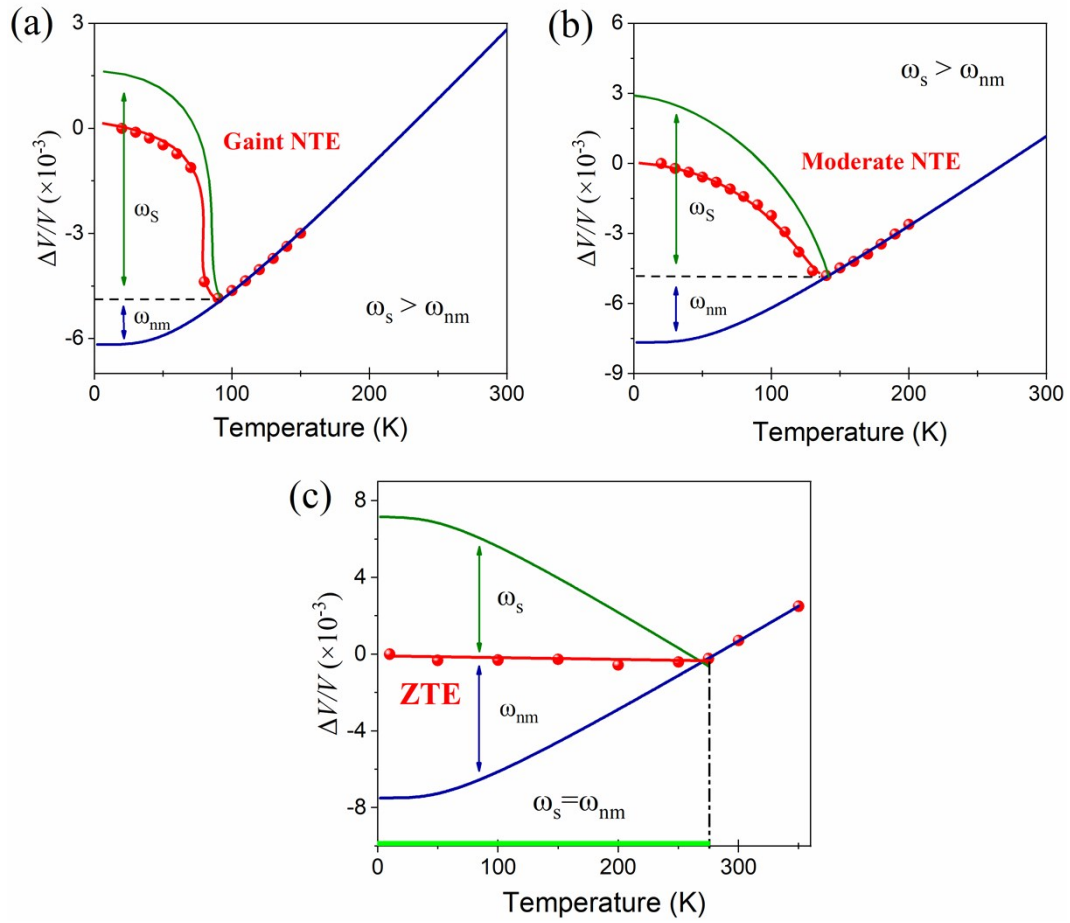

**Figure S5.** Experimental and calculated thermal expansion of (a) HC, (b) HCF, and (c) GHCF. The  $\omega_{exp}$  is the relative ratio of experimental volume, and  $\omega_{nm}$  is nominal thermal expansion on the basis of Debye-Grüneisen model.

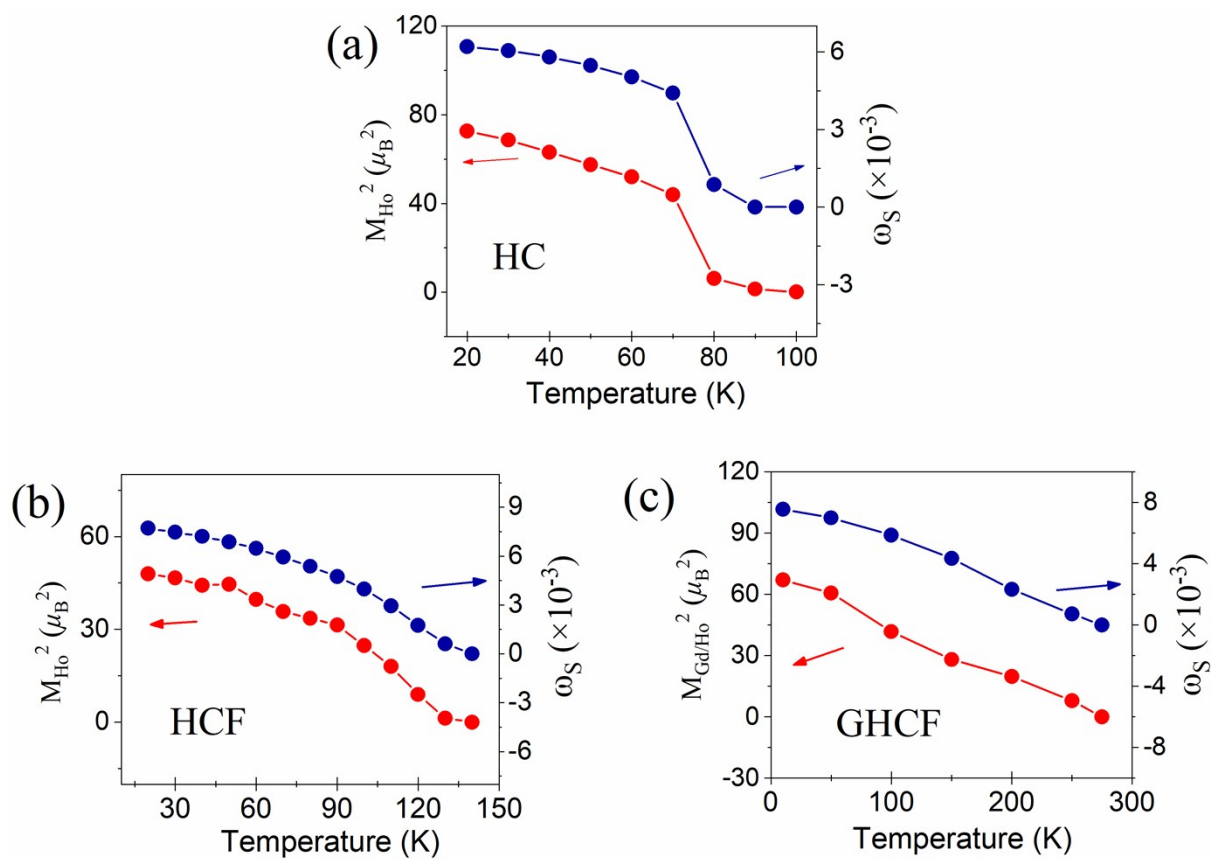

**Figure S6.** Quantitative relationship between  $M_R^2$  and  $\omega_s$  in (a) HC, (b) HCF and (c) GHCF

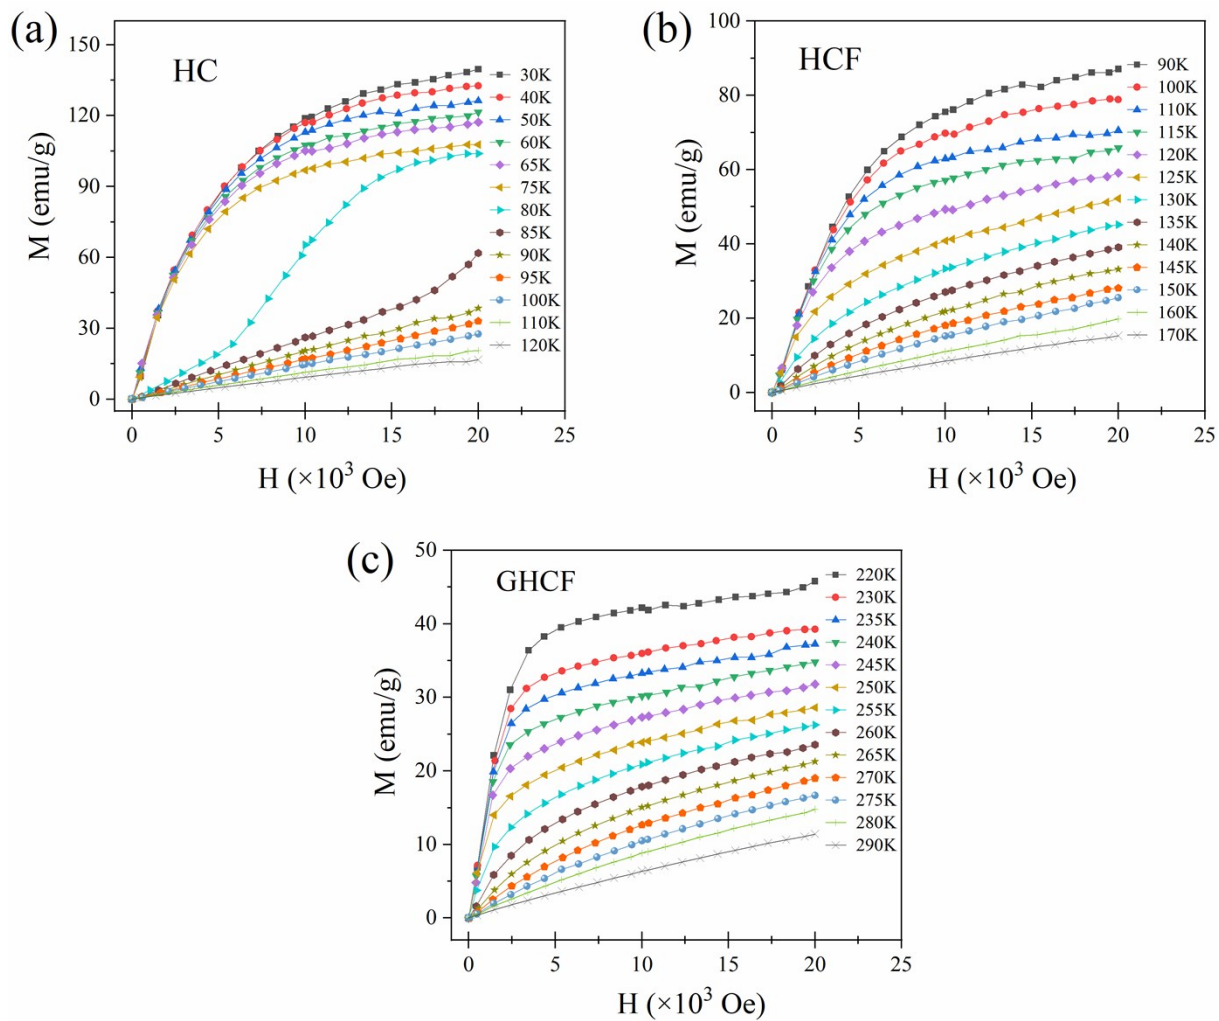

**Figure S7.** Isothermal  $M$ - $H$  curves (0 - 20 KOe) for (a) HC, (b) HCF and (c) GHCF.

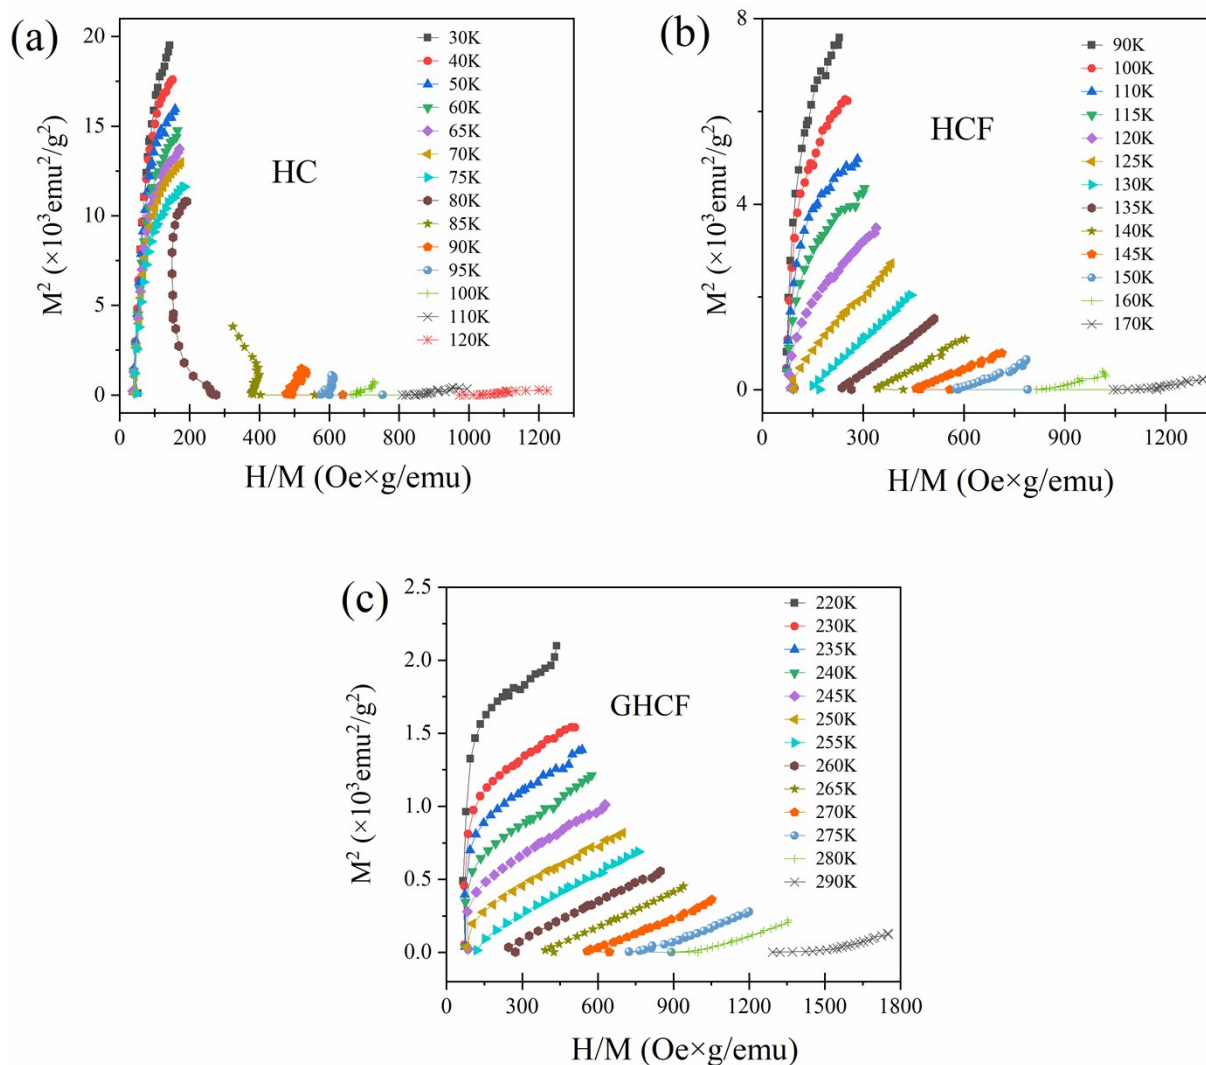

**Figure S8.** Isothermal Arrott plots of  $M^2$  versus  $H/M$  derived from  $M-H$  curves for (a) HC, (b) HCF and (c) GHCF.

## Reference

1 K. Kato, Y. Tanaka, M. Yamauchi, K. Ohara and T. Hatsui, *J. Synchrotron Radiat.*, 2019, **26**, 762-773.
